# Supplementary material
Source: MDPI journal article supplement (https://www.mdpi.com/2673-4583/5/1/44)

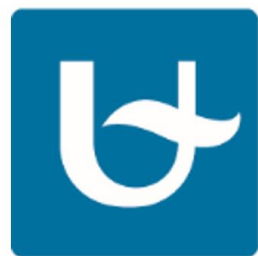

**AXES**

Antwerp X-ray Analysis,  
Electrochemistry & Speciation  
University of Antwerp

# Portable electrochemical detection of illicit drugs in smuggled samples: towards more secure borders

**CSAC2021: 1st International Electronic Conference on  
Chemical Sensors and Analytical Chemistry**

**Electrochemical Devices and Sensors Session**

Marc Parrilla, Amorn Slosse, Robin Van Echelpoel, Noelia Felipe Montiel,  
Filip Van Dumme, and Karolien De Wael

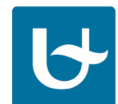

# PROBLEM → DRUG CONSUMPTION IN SOCIETY

## Cocaine

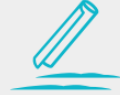

Adults (15-64)

Last year use

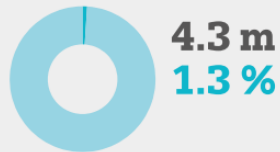

Lifetime use

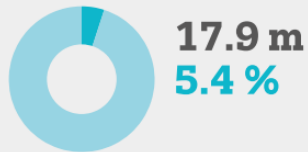

Young adults (15-34)

Last year use

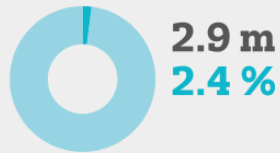

National estimates  
of use in last year

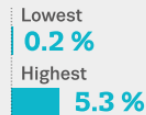

## MDMA

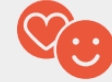

Adults (15-64)

Last year use

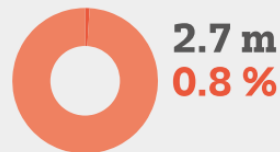

Lifetime use

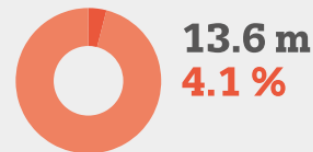

Young adults (15-34)

Last year use

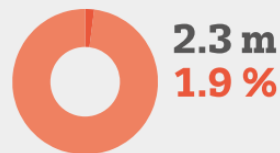

National estimates  
of use in last year

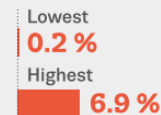

## Amphetamines

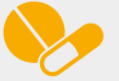

Adults (15-64)

Last year use

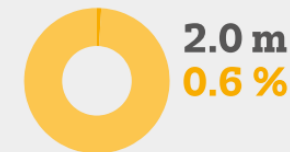

Lifetime use

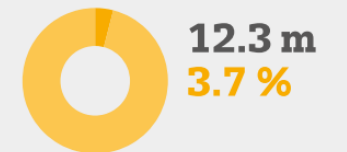

Young adults (15-34)

Last year use

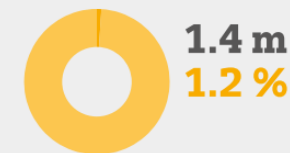

National estimates  
of use in last year

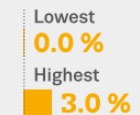

## Heroin and other opioids

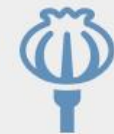

High-risk opioid users

1.3 million

660 000

opioid users received substitution  
treatment in 2018

Drug treatment requests

Principal drug in  
about 34 % of all  
drug treatment  
requests in the  
European Union

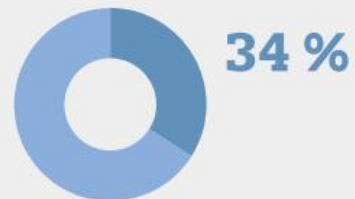

Fatal overdoses

Opioids are  
found in  
82 % of fatal  
overdoses

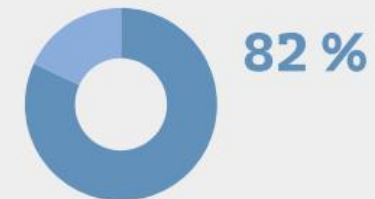

# SOLUTION: BLOCK DRUG TRACKING & SEIZING IN THE STREET

## Current methods (e.g. Raman) exhibit challenges!

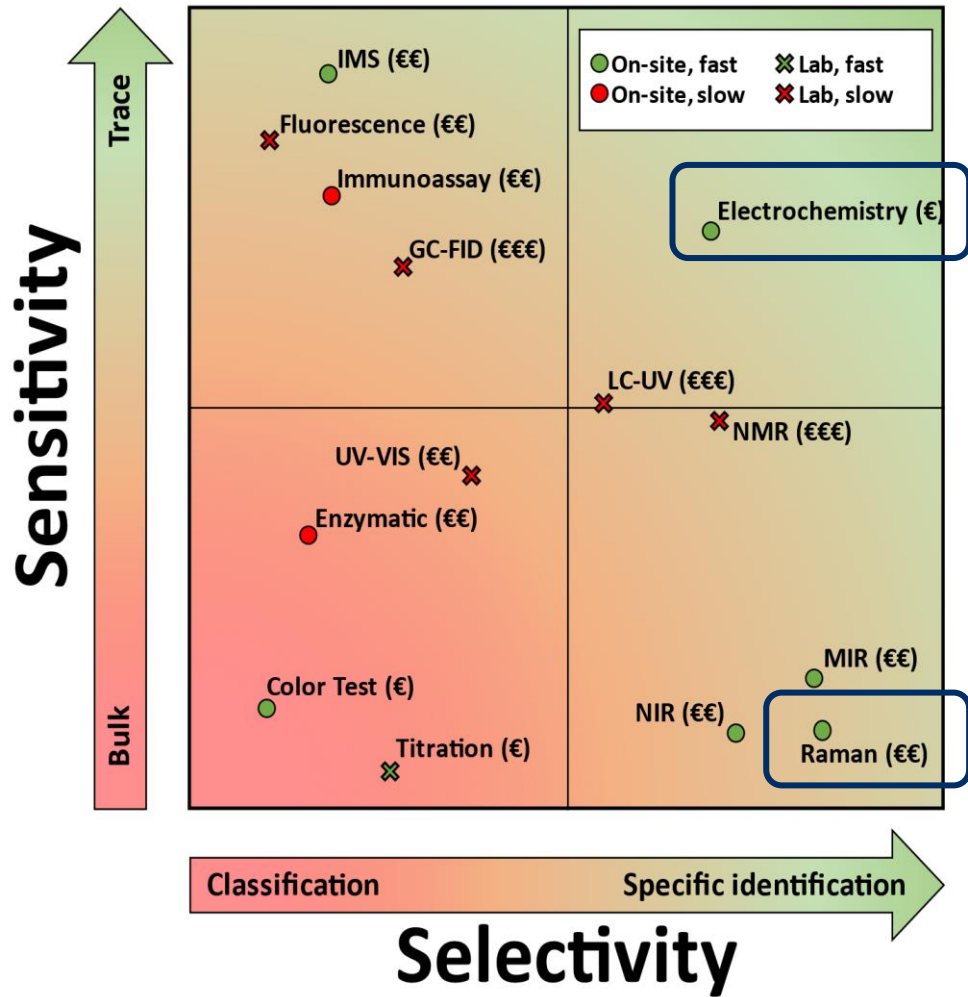

Rapid and affordable on-site testing by the use of electrochemical sensors

Bulky and expensive commercial device used at border settings

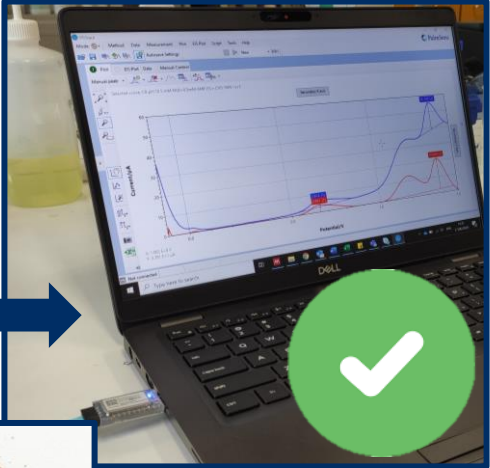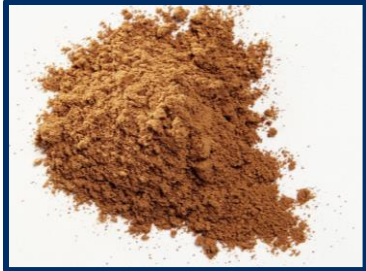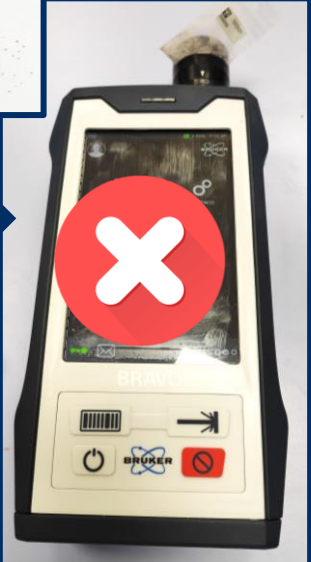

# Building the library: Electrochemical profiling of illicit drugs

Detection of targeted illicit drugs according to its oxidation potential at certain specific conditions

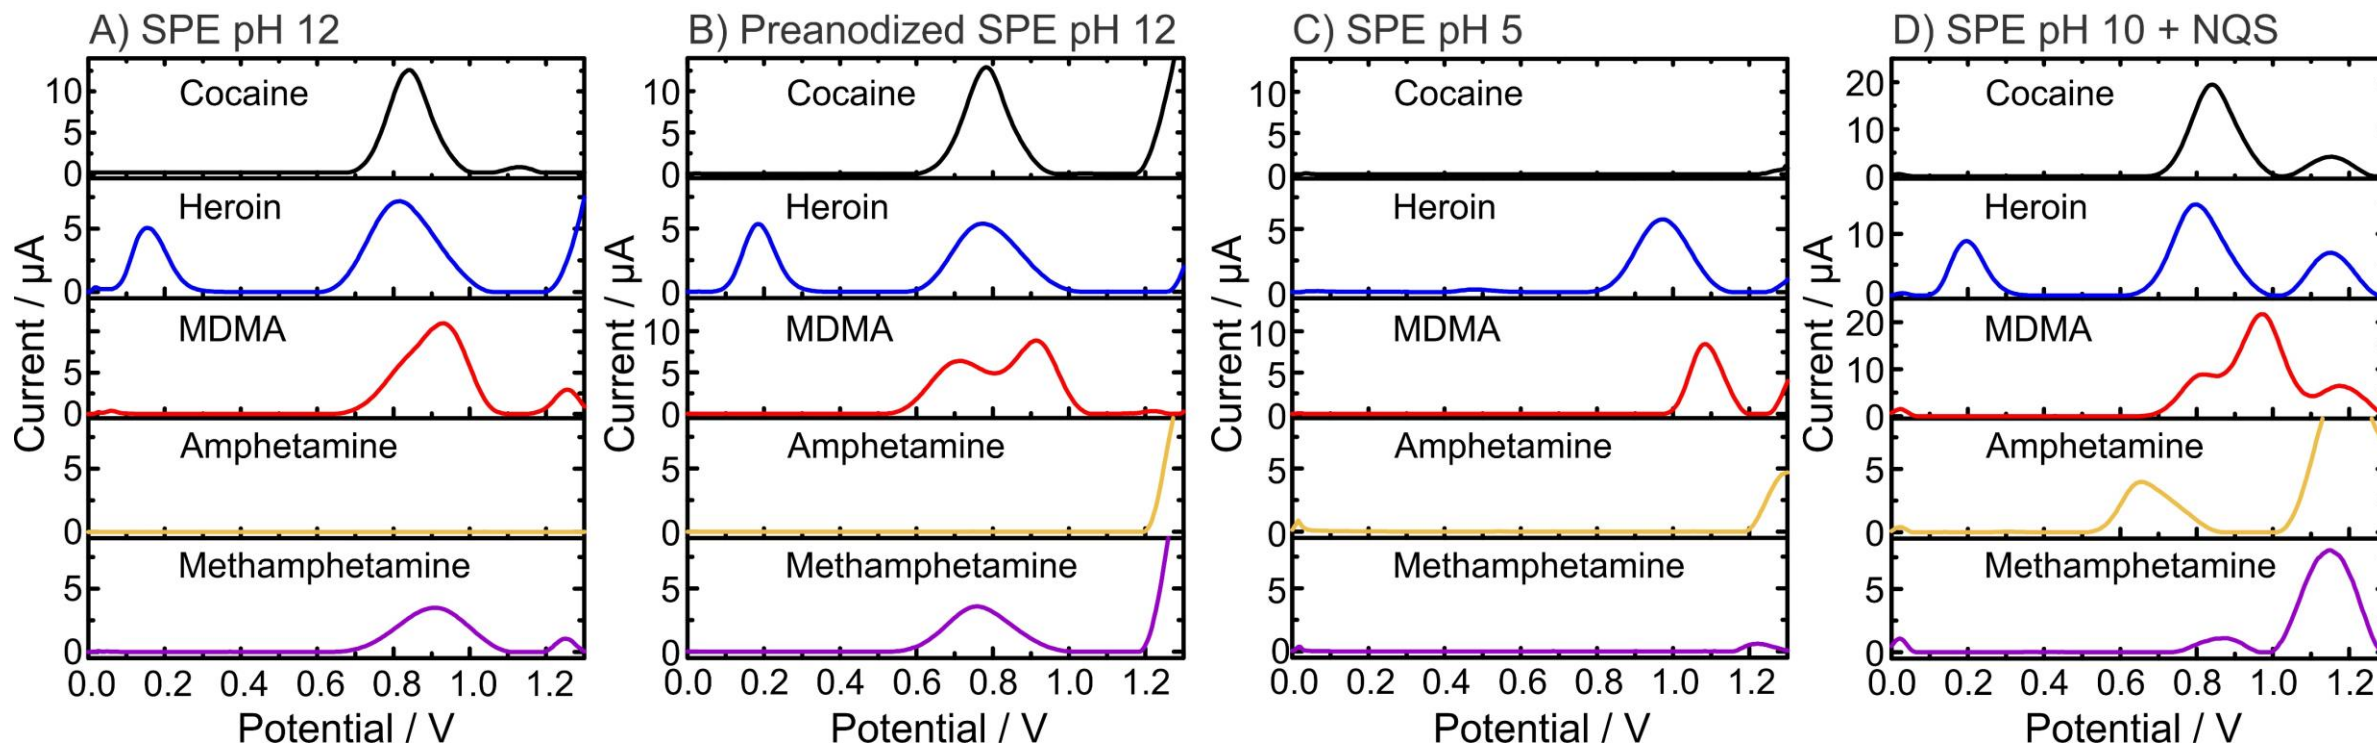

**Figure 1.** Electrochemical profiles of illicit drugs (0.5 mM) obtained by square-wave voltammetry (SWV) using SPE at different pH: A) pH 12; B) pH 12 using preanodized SPE; pH 5; and pH 10 including the derivatizing agent NQS.



# Building the library: Electrochemical profiling of cutting agents

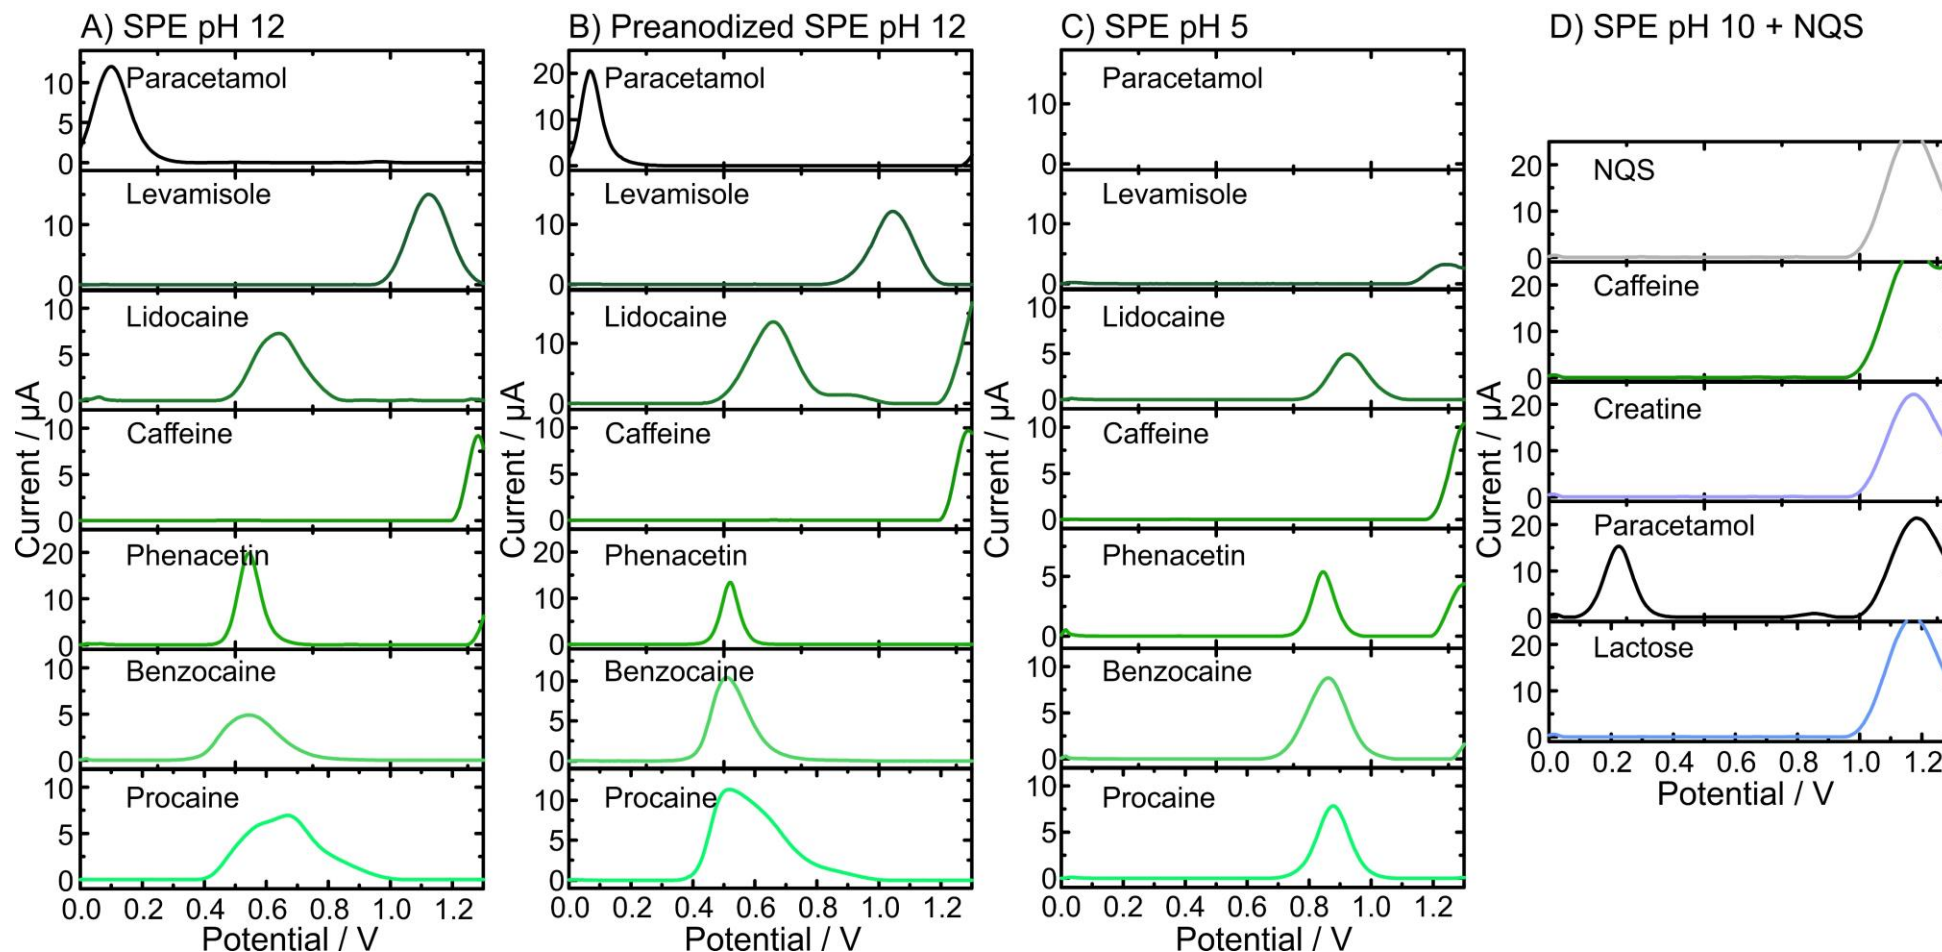

**Figure 2.** Electrochemical profiles of common cutting agents (0.5 mM) obtained by square-wave voltammetry (SWV) using SPE at different pH: A) pH 12; B) pH 12 using preanodized SPE; pH 5; and pH 10 including the derivatizing agent NQS.

# Portable electrochemical device for the on-site detection

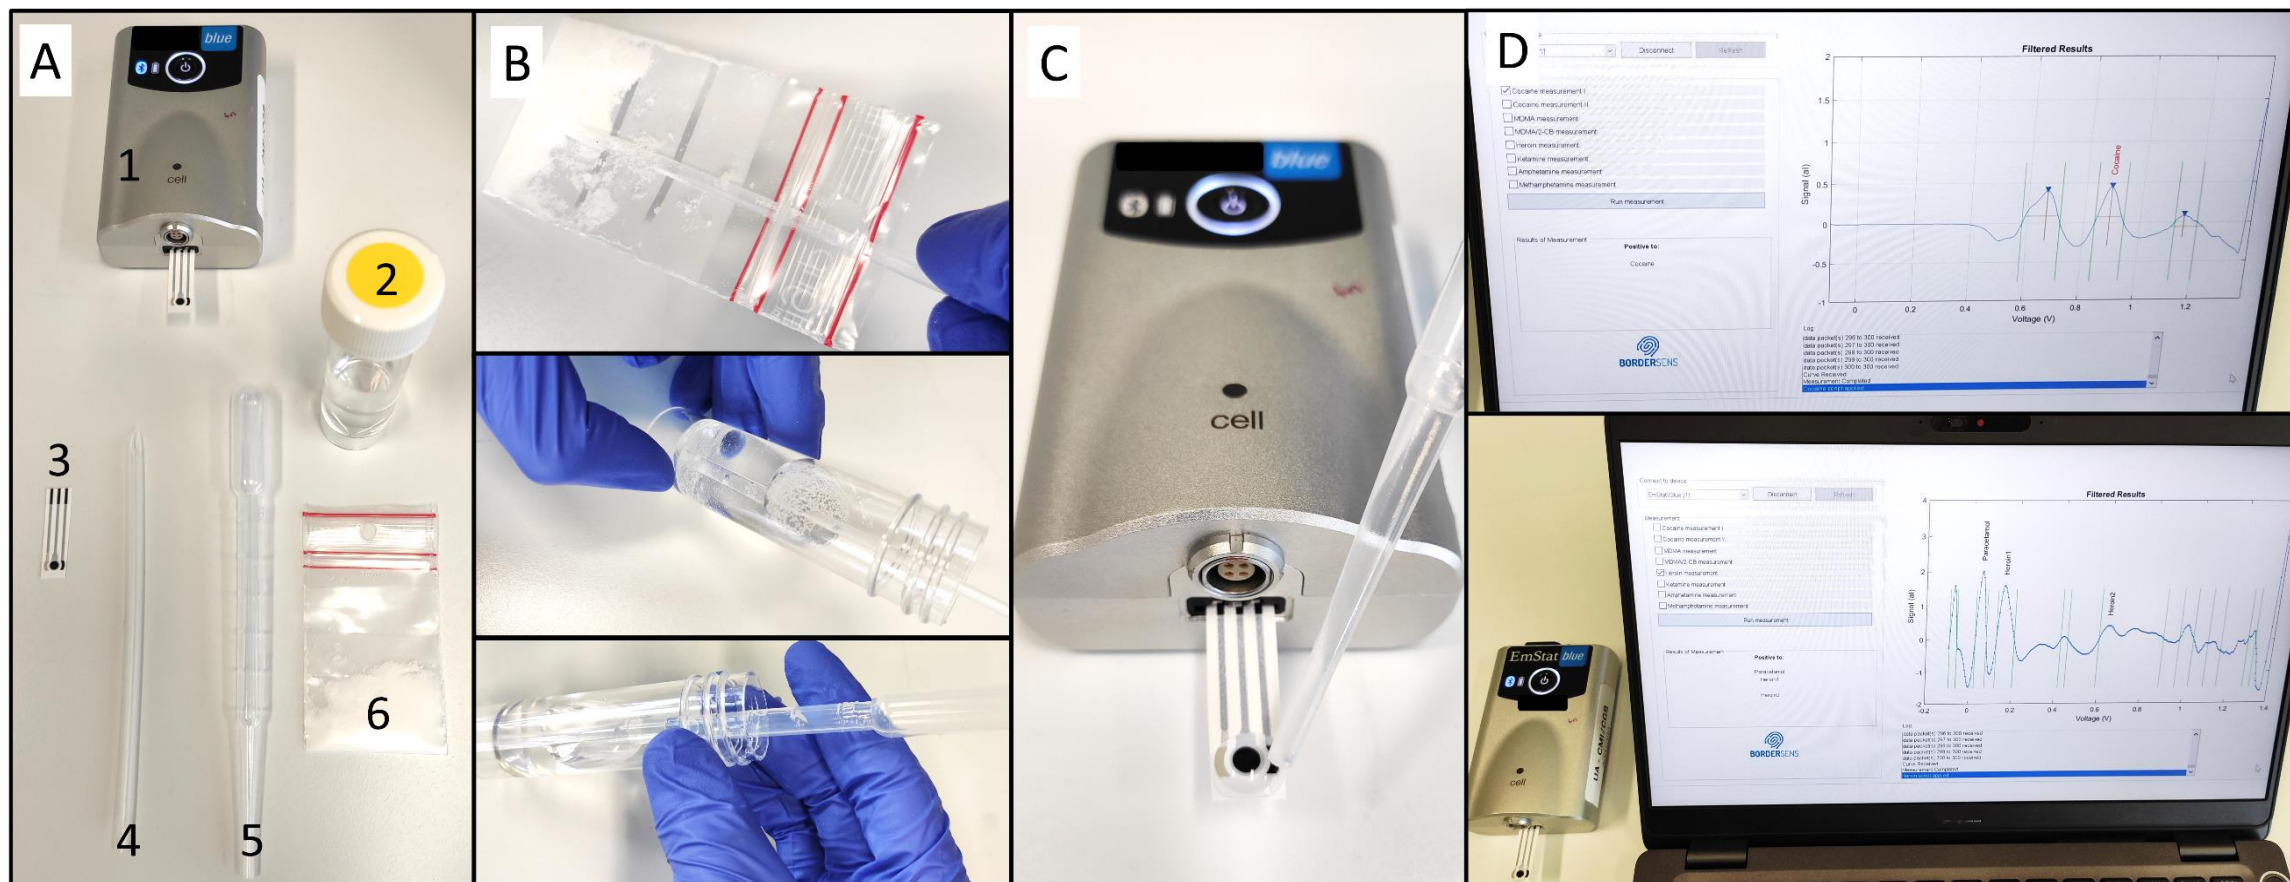

**Figure 3.** A) Elements of the electrochemical device (1-potentiostat, 2-buffer container, 3-SPE, 4-disposable spatula, 5-disposable pipette, 6-confiscated sample); B) Sampling procedure; C) deposition of the solution on the setup ready for the electrochemical interrogation; and D) user-friendly interface showing the results of the analysis with identification.

# Results of the analysis of seized samples.

| Seized illicit drug | Accuracy electrochemical device | Accuracy portable Raman |
|---------------------|---------------------------------|-------------------------|
| Cocaine (n=10)      | 100 %                           | 70 %                    |
| Heroin (n=10)       | 100 %                           | 10 %                    |
| MDMA (n=10)         | 100 %                           | 100 %                   |
| Amphetamine (n=10)  | 100 %                           | 20 %                    |

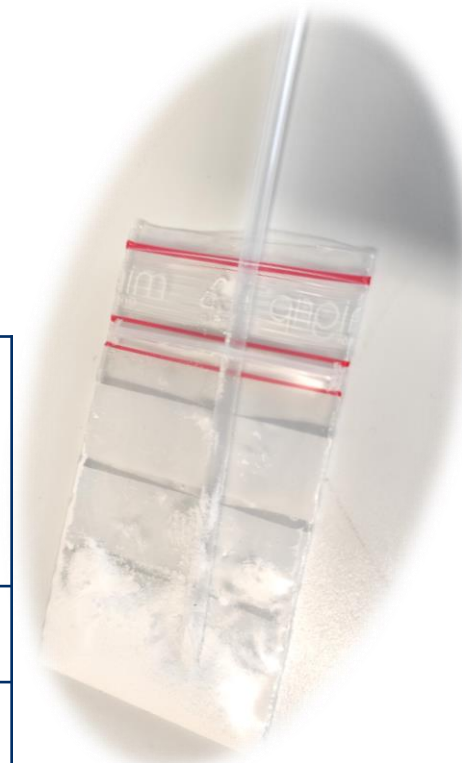

- Results based on the identification by the peak potential of each illicit drug at certain conditions.
- 10 seized samples were analyzed for each illicit drug. A total of 40 samples.
- The accuracy was calculated according to the GC-MS analysis.

# Conclusions

- 1. The construction of a library from electrochemical profiles of illicit drugs and common cutting agents at different conditions is performed.**
- 2. Development of a tailor-made script with the integration of the peak potentials of each target for automatic identification.**
- 3. The analysis of 40 confiscated samples from illicit drugs is attained using a portable electrochemical device.**
- 4. The analysis of the confiscated samples is validated by GC-MS and compared with portable Raman commonly used by law enforcement agents.**
- 5. The electrochemical device outperformed the commercial Raman device.**



# Acknowledgements

- European Union's **Horizon 2020** research and innovation programme under the grant agreement No 833787, BorderSens.
- **University of Antwerp (IOF)**
- **Research Foundation – Flanders (FWO)**
- National Institute for Criminalistics and Criminology, Belgium

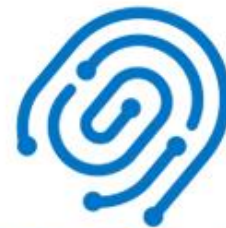

**BORDERSENS**

<https://bordersens.eu/>

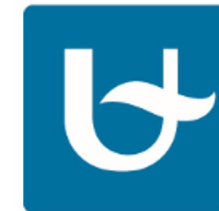

**AXES**

Antwerp X-ray Analysis,  
Electrochemistry & Speciation  
University of Antwerp

<https://www.uantwerpen.be/en/research-groups/axes/>



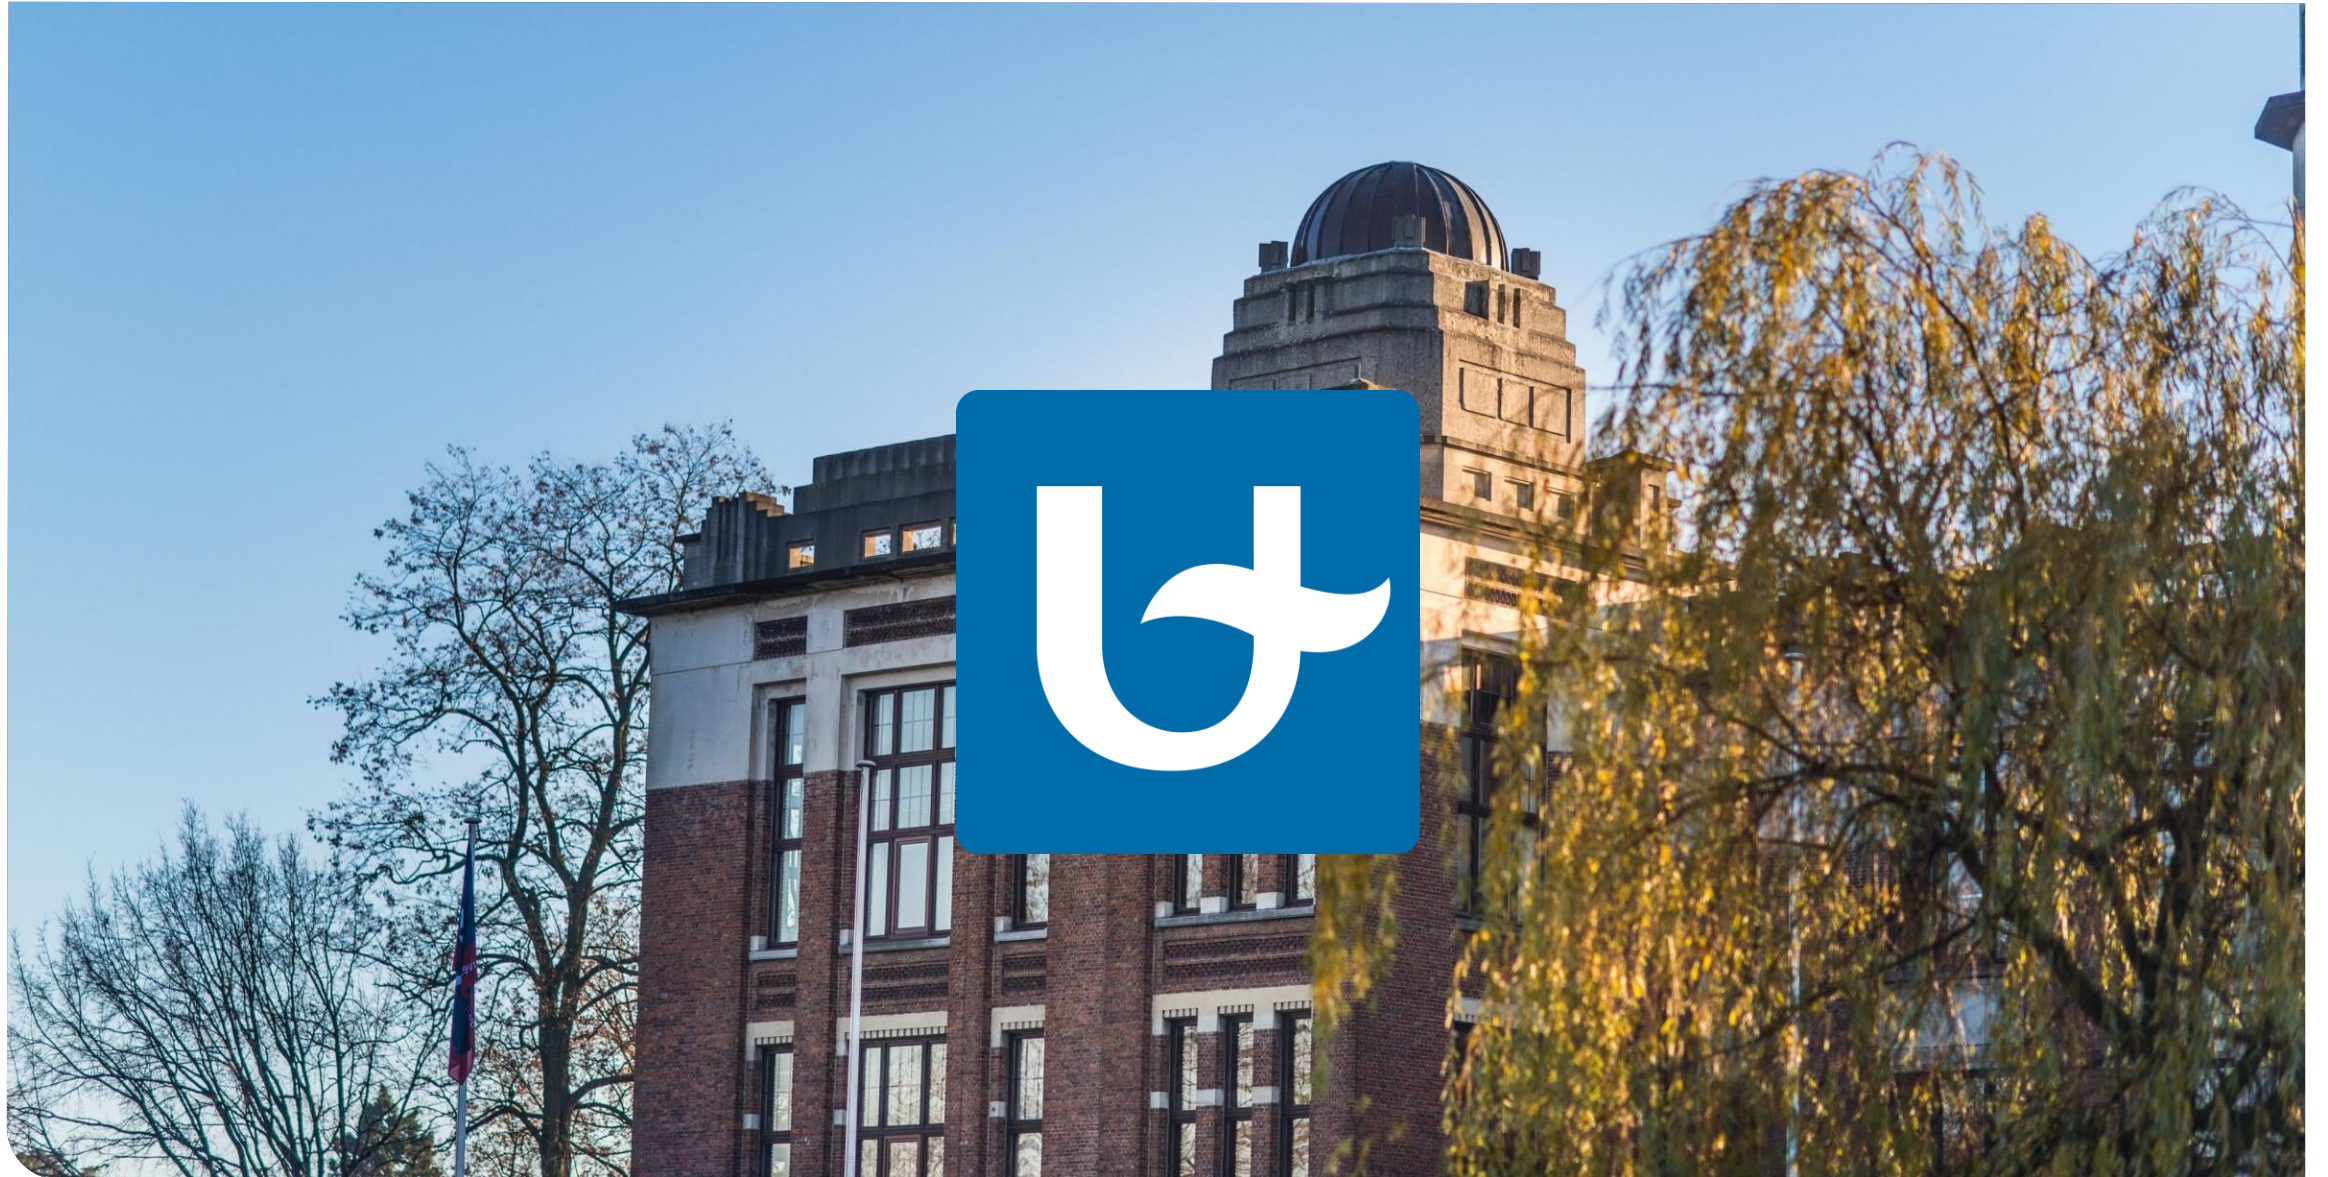

Supplement: s1 [file s1]
